# Supplementary material for: Diagnostic Role of Bronchoalveolar Lavage in Patients with Suspected SARS-CoV-2 Pneumonia and Negative Upper Respiratory Tract Swab: A Systematic Review and Meta-Analysis
Source: MDPI journal article supplement (doi:10.3390/jcm11164656), 2022-08-09
Supplement: s1 [file s1]

## Supplementary materials

### Search strategy

#### *PUBMED:*

("bronchoalveolar lavage"[MeSH Terms] OR ("bronchoalveolar"[All Fields] AND "lavage"[All Fields])  
OR "bronchoalveolar lavage"[All Fields] OR ("bronchoalveolar lavage fluid"[MeSH Terms]  
OR ("bronchoalveolar"[All Fields]  
AND "lavage"[All Fields] AND "fluid"[All Fields]) OR "bronchoalveolar lavage fluid"[All  
Fields])  
OR ("bronchoscopy"[MeSH Terms] OR "bronchoscopy"[All Fields] OR  
"bronchoscopies"[All Fields]))  
AND ("covid 19"[All Fields] OR "covid 19"[MeSH Terms] OR "covid 19 vaccines"[All  
Fields] OR "covid 19 vaccines"[MeSH Terms]  
OR "covid 19 serotherapy"[All Fields] OR "covid 19 serotherapy"[Supplementary  
Concept]  
OR "covid 19 nucleic acid testing"[All Fields] OR "covid 19 nucleic acid testing"[MeSH  
Terms]  
OR "covid 19 serological testing"[All Fields] OR "covid 19 serological testing"[MeSH  
Terms]  
OR "covid 19 testing"[All Fields] OR "covid 19 testing"[MeSH Terms] OR "sars cov 2"[All  
Fields]  
OR "sars cov 2"[MeSH Terms] OR "severe acute respiratory syndrome coronavirus 2"[All  
Fields]  
OR "ncov"[All Fields] OR "2019 ncov"[All Fields]  
OR (("coronavirus"[MeSH Terms] OR "coronavirus"[All Fields] OR "cov"[All Fields])  
AND 2019/11/01:3000/12/31[Date - Publication]))

#### *EMBASE*

'lung lavage'/exp OR 'bronchoalveolar lavage fluid'/exp OR 'bronchoscopy'  
AND 'coronavirus disease 2019'/exp
